# Supplementary material for: Herd health status and management practices on 16 Irish suckler beef farms
Source: PubMed Central journal article supplement (PMC3903451; doi:10.1186/2046-0481-66-21), 2013-11-06
Supplement: 2046-0481-66-21-S1.pdf [file 2046-0481-66-21-S1.pdf]

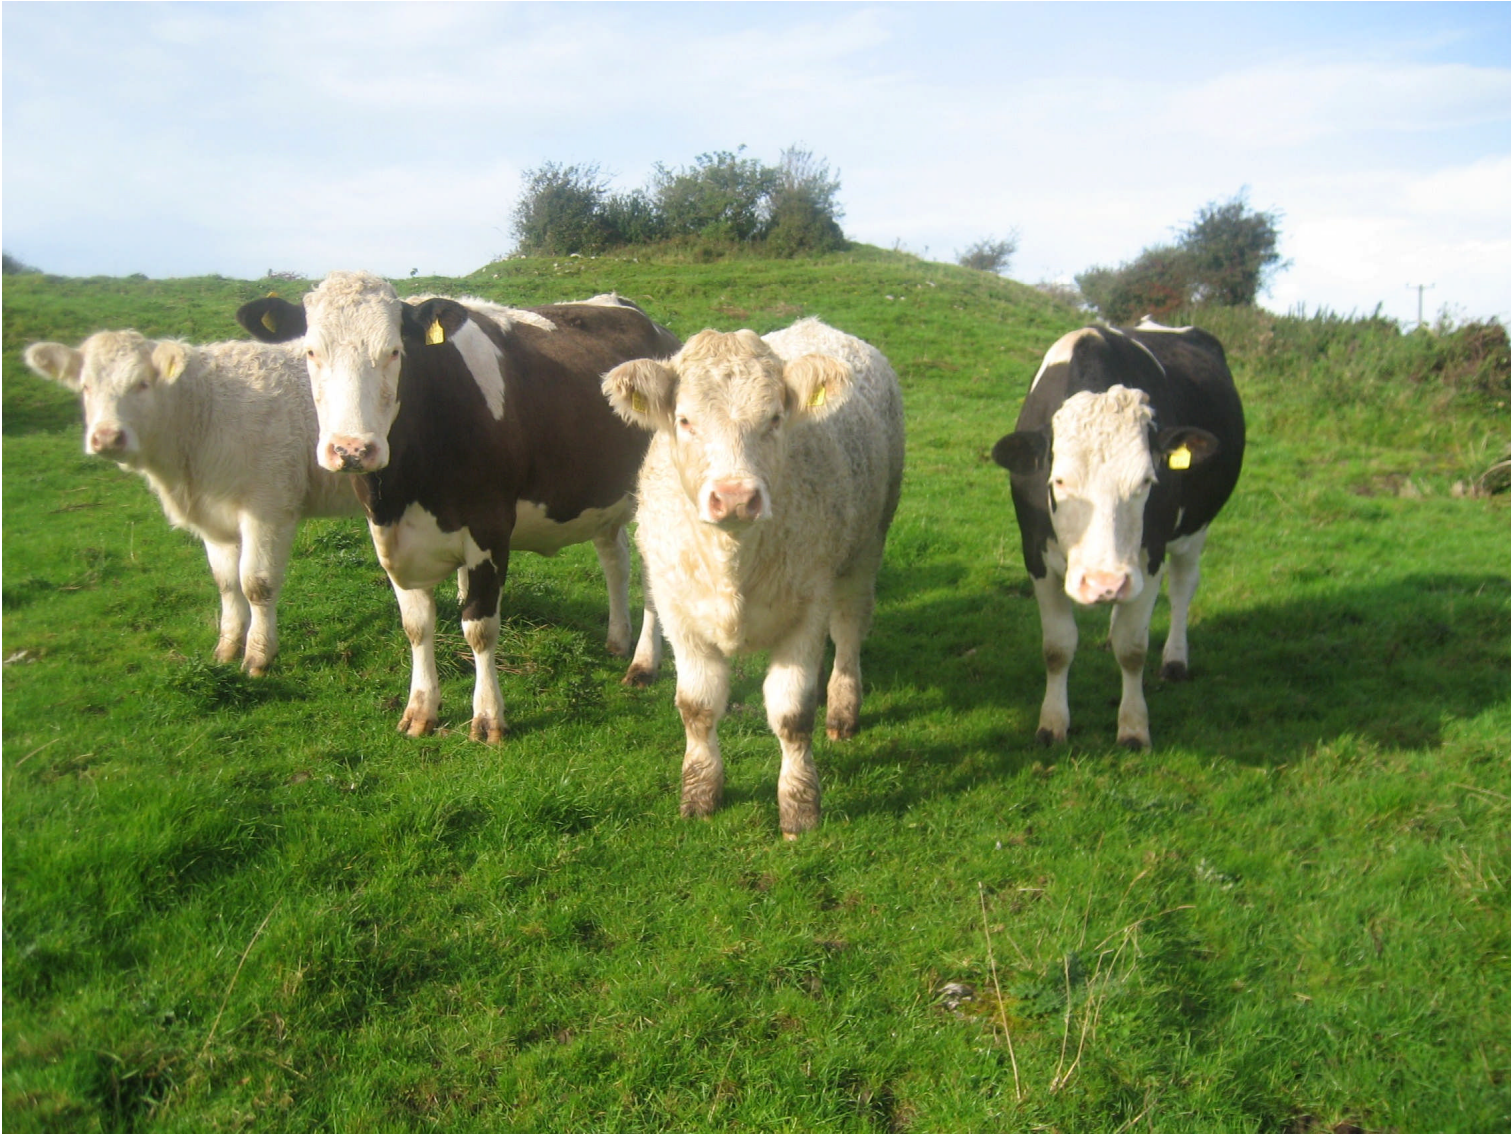

**BETTER farm project animal health background information**

Farmer name:

Address:

Phone number:

Mobile:

E-mail address:

GPS grid code:

ICBF Log in information:

Herd number:

Teagasc advisor:

Phone number of advisor:

Veterinary clinician:

Veterinary practice address:

Phone number of clinician:

mobile:

Enterprise type:

|      |       |       |         |       |
|------|-------|-------|---------|-------|
| Beef | Sheep | Dairy | Tillage | Other |
|      |       |       |         |       |

Organic farm:

|     |  |    |  |
|-----|--|----|--|
| Yes |  | No |  |
|-----|--|----|--|

Is the farmer in the suckler welfare scheme?

|     |  |
|-----|--|
| Yes |  |
| No  |  |

Livestock numbers:

|                           | 2009 | 2010 |
|---------------------------|------|------|
| Total number of livestock |      |      |
| Young (<12 months)        |      |      |
| 12-24 months old females  |      |      |
| 12-24 months old males    |      |      |
| Females over 24 months    |      |      |
| Males over 24 months      |      |      |

Stocking density:

|      |  |      |  |
|------|--|------|--|
| 2009 |  | 2010 |  |
|------|--|------|--|

Calving and fertility data:

- calving pattern in 2009 and 2010

|                | 2009 | 2010 |
|----------------|------|------|
| Spring         |      |      |
| Autumn         |      |      |
| All year round |      |      |

- Number calved per month 2009/2010

|      | Jan | Feb | Mar | Apr | May | Jun | July | Aug | Sep | Oct | Nov | Dec |
|------|-----|-----|-----|-----|-----|-----|------|-----|-----|-----|-----|-----|
| 2009 |     |     |     |     |     |     |      |     |     |     |     |     |
| 2010 |     |     |     |     |     |     |      |     |     |     |     |     |

- Total number of calvings in 2009 \_\_\_\_\_ 2010 \_\_\_\_\_
- categories of calving based on ICBF events sheets

|        | normal | Some assistance | Considerable assistance | Vet. assisted |
|--------|--------|-----------------|-------------------------|---------------|
|        | 1      | 2               | 3                       | 4             |
| Amount |        |                 |                         |               |
| 2009   |        |                 |                         |               |
| 2010   |        |                 |                         |               |

- calving interval 2009 \_\_\_\_\_ 2010 \_\_\_\_\_
- number of calves per cow/per year 2009 \_\_\_\_ 2010 \_\_\_\_\_
- number of calves born dead  
2009 \_\_\_\_\_ 2010 \_\_\_\_\_
- number of calves born dead or dead within 28 days  
2009 \_\_\_\_\_ 2010 \_\_\_\_\_

## BETTER farm animal health questionnaire

Date:

Farmer name:

- Background to farm
- Housing and calving facilities
- Calf/Yearling health (0-12 months old)
- Calving time
- Parasites/worming
- Cow health
- Lameness
- Nutrition
- Fertility and breeding
- Biosecurity

**Background to farm:**

(1) Part (pt) or full time (ft) farmer:

|    |  |    |  |
|----|--|----|--|
| Pt |  | Ft |  |
|----|--|----|--|

(2) If you are a part time farmer, was your source of off farm work seasonal or continuous in 2009 and 2010?

|            |      |      |
|------------|------|------|
|            | 2009 | 2010 |
| Continuous |      |      |
| Seasonal   |      |      |

(3) If seasonal then for how many months? \_\_\_\_\_

(4) What months of the year did this involve? \_\_\_\_\_

(5) Size of farm

|          |
|----------|
| Hectares |
|----------|

(6) How much of the farm was owned/ rented in 2009/2010?

|        |      |      |
|--------|------|------|
|        | 2009 | 2010 |
| Owned  |      |      |
| Rented |      |      |

(7) Type of herd:

|                 |                                                                                                                                      |
|-----------------|--------------------------------------------------------------------------------------------------------------------------------------|
|                 | Definition                                                                                                                           |
| Closed herd     | No animal re-entry, no bought in animals, no fence line contact with other herds.                                                    |
| Restricted herd | Only re-entry of existing animals e.g. from shows                                                                                    |
| Open herd       | Routine purchase, re-entry and movement of animals; direct co-mingling of introduced animals of unknown background with herd animals |

(8) If the herd is open how many animals were bought in 2009 and 2010?

|                                  | 2009 | 2010 |
|----------------------------------|------|------|
| Young (<12 months)               |      |      |
| 12-24 months old females         |      |      |
| 12-24 months old males           |      |      |
| Females over 24 months           |      |      |
| Males over 24 months             |      |      |
| Total number of livestock bought |      |      |

(9) How many weanlings produced on farm in 2009 and 2010?

| 2009 |  | 2010 |  |
|------|--|------|--|
|      |  |      |  |

(10) What happened to weanlings produced on the farm in 2009 and 2010?

|                       | 2009(No.) | 2010 (No.) |
|-----------------------|-----------|------------|
| All weaned and sold   |           |            |
| Some but not all sold |           |            |
| Sold as stores        |           |            |
| Finished on farm      |           |            |

(11) Did you have store cattle (12-24 months old and not for breeding) in 2009/2010?

|      | Yes | No |
|------|-----|----|
| 2009 |     |    |
| 2010 |     |    |

(12) How many in each year?

|      | Number |
|------|--------|
| 2009 |        |
| 2010 |        |

(13) How many of these were finished on farm in 2009 and 2010?

|      | heifers | Steers | Bulls |
|------|---------|--------|-------|
| 2009 |         |        |       |
| 2010 |         |        |       |

(14) What age were these animals finished at?

|      | Heifers | Steers | Bulls |
|------|---------|--------|-------|
| 2009 |         |        |       |
| 2010 |         |        |       |

(15) In 2009 and 2010 how many females 22 month of age and over were not intended to be used for breeding? (any female 22 months or older is classified as a breeding animal by the ICBF).

|      |  |
|------|--|
| 2009 |  |
| 2010 |  |



## Housing and calving facilities:

(1a) Where did the cows, calves and other livestock overwinter in 2008/2009? Quantify.

|                                    | Cows | Calves | Bull(s) | Steers | Heifers | Sheep |
|------------------------------------|------|--------|---------|--------|---------|-------|
| Slatted housing                    |      |        |         |        |         |       |
| Slatted housing with rubber mats   |      |        |         |        |         |       |
| Creep area                         |      |        |         |        |         |       |
| Straw bedded                       |      |        |         |        |         |       |
| Cubicle housing                    |      |        |         |        |         |       |
| Peat based                         |      |        |         |        |         |       |
| Woodchip based                     |      |        |         |        |         |       |
| Outdoor pad                        |      |        |         |        |         |       |
| Individual pen                     |      |        |         |        |         |       |
| Grazing winter brassicas e.g. kale |      |        |         |        |         |       |
| Other                              |      |        |         |        |         |       |

(1b) Where did the cows, calves and other livestock overwinter in 2009/2010? Quantify.

|                                    | Cows | Calves | Bull(s) | Steers | Heifers | Sheep |
|------------------------------------|------|--------|---------|--------|---------|-------|
| Slatted housing                    |      |        |         |        |         |       |
| Slatted housing with rubber mats   |      |        |         |        |         |       |
| Creep area                         |      |        |         |        |         |       |
| Straw bedded                       |      |        |         |        |         |       |
| Cubicle housing                    |      |        |         |        |         |       |
| Peat based                         |      |        |         |        |         |       |
| Woodchip based                     |      |        |         |        |         |       |
| Outdoor pad                        |      |        |         |        |         |       |
| Individual pen                     |      |        |         |        |         |       |
| Grazing winter brassicas e.g. kale |      |        |         |        |         |       |
| Other                              |      |        |         |        |         |       |

2) If the calves have access to a creep area how many are usually in there?

\_\_\_\_\_

3) Is there separate accommodation for a bull? \_\_\_\_\_

4) Is there an isolation box/area for sick animals? \_\_\_\_\_

5) Is there an isolation box/area for bought-in animals? \_\_\_\_\_

6) Do animals calve inside or outdoors ?

|                |  |
|----------------|--|
| Calve indoors  |  |
| Calve outdoors |  |
| Both           |  |

7) What facilities exist?

|                                          |  |
|------------------------------------------|--|
| Common calving pen                       |  |
| Individual pens and how many (1 per 20)? |  |
| If none of the above, please specify     |  |

8) What is the floor of the calving pen made of?

|                                    |  |
|------------------------------------|--|
| Concrete                           |  |
| Earth                              |  |
| If none of the above, please state |  |

9) How long do newborn calves stay in the calving pen until they join the rest of the calves? \_\_\_\_\_

10) How often are calving pens cleaned and disinfected?

|                                |  |
|--------------------------------|--|
| After every calving            |  |
| Between every 2 and 5 calvings |  |
| After more than 5 calvings     |  |

11) What disinfectant is used to clean the calving pen? \_\_\_\_\_

12) Do you follow manufacturer's instructions when using it? \_\_\_\_\_

13) How often is bedding material added to the calving pens?

|                            |  |
|----------------------------|--|
| Every day                  |  |
| After every calving        |  |
| Between 2 and 5 calvings   |  |
| After more than 5 calvings |  |

14) What bedding material is used? \_\_\_\_\_

**Calf /Yearling health ( 0-12 months):**

1) Of the calves that died from birth to weaning what were these deaths attributed to? In the boxes provided please enter the number and age of the animals that died.

|                                   | 2009 | 2010 |
|-----------------------------------|------|------|
| Stillborn or weak calves          |      |      |
| Diarrhoea                         |      |      |
| Pneumonia                         |      |      |
| Septicaemia                       |      |      |
| Accidental deaths/Injury          |      |      |
| Meningitis                        |      |      |
| CCN                               |      |      |
| Congenital defects                |      |      |
| Joint ill/navel ill complications |      |      |
| Bleeding calf syndrome            |      |      |
| Clostridial disease               |      |      |
| Coccidiosis                       |      |      |
| Hypomag. tetany                   |      |      |
| Other reasons                     |      |      |

2) Have you had any calves born in the last 5 years with congenital defects and if so what was the diagnosis? \_\_\_\_\_

3) Are dams vaccinated with a pre-calving scour vaccine? \_\_\_\_\_

4) What is the product if one is used? \_\_\_\_\_

5) Do you use any respiratory vaccines on the calves in the first 12 weeks of life?  
\_\_\_\_\_

6) If you do what product do you use? \_\_\_\_\_

7) How many doses? \_\_\_\_\_

8) Are calves vaccinated against pneumonia pre-housing/pre-sale? Please specify

\_\_\_\_\_

9) If so when is it done in relation to sale or housing? \_\_\_\_\_

10) What product is used? \_\_\_\_\_

11) How many doses are used per animal? \_\_\_\_\_

12) Do you use any preventative medicine for coccidiosis? \_\_\_\_\_

13) If you do, what product do you use? \_\_\_\_\_

14) When do you give it? \_\_\_\_\_

15) What age do you give it at? \_\_\_\_\_

16) Has Cryptosporidium been diagnosed on your farm in the last five years? \_\_\_\_\_

17) If it was diagnosed do you now use any preventative medicine for it? \_\_\_\_\_

18) What product do you use? \_\_\_\_\_

19) What age do you first give it at? \_\_\_\_\_

20) How much do you give per day? \_\_\_\_\_

21) How long for? \_\_\_\_\_

22) Do you vaccinate your calves against Clostridial diseases such as blackleg for example? \_\_\_\_\_

23) What product do you use? \_\_\_\_\_

24) How many doses do you give? \_\_\_\_\_

25) When do you give it? \_\_\_\_\_

26) Have any of your calves suffered from ringworm in 2009 or 2010?

|      |  |
|------|--|
| 2009 |  |
| 2010 |  |

27) What treatment did you undertake for it? \_\_\_\_\_

\_\_\_\_\_

28) Are calves creep fed before weaning? \_\_\_\_\_

30) How long are they creep fed before weaning? \_\_\_\_\_

31) How long are they fed concentrates after weaning? \_\_\_\_\_

32) How much creep is given per head? \_\_\_\_\_

33) Do you forward creep graze ( allow calves graze ahead of cows) ? \_\_\_\_\_

34) What age are calves weaned at? \_\_\_\_\_

35) What age are calves disbudded at? \_\_\_\_\_

36) Do you use local anaesthetic at any stage? \_\_\_\_\_

37) Are male calves castrated? \_\_\_\_\_

38) What age is it performed at? \_\_\_\_\_

39) What method is used? \_\_\_\_\_

40) Are cows with female calves separated from cows with male calves at pasture?

\_\_\_\_\_

41) At what age is it done at? \_\_\_\_\_

**Calving time:**

1) Number of vet-assisted calvings in 2009 and 2010

2009 \_\_\_\_\_ 2010 \_\_\_\_\_

2) Number of calvings that were caesareans? 2009 \_\_\_\_\_ 2010 \_\_\_\_\_

3) How often are animals inspected once they are sick to calve/stage 1 of labour has begun? \_\_\_\_\_

4) How long do you leave them to calve unassisted once the feet appear?

Heifers \_\_\_\_\_ Cows \_\_\_\_\_

5) Do you use any aids such as a calving camera? \_\_\_\_\_

6) Are navels disinfected? \_\_\_\_\_?

7) If so what is used? \_\_\_\_\_

8) Are afterbirths disposed of? \_\_\_\_\_

9) Where are they disposed of? \_\_\_\_\_

10) Do you ensure the calf has received colostrum by .....

|                          |  |  |
|--------------------------|--|--|
| Observation of suckling  |  |  |
| Stomach tubing           |  |  |
| Bottle and teat          |  |  |
| Other method and specify |  |  |

11) Do calves receive colostrum only from their mothers? \_\_\_\_\_

12) Are any calves supplemented with additional colostrum that you may have stored from other on farm cows/heifers? \_\_\_\_\_

13) Have you ever used external sources of colostrum in the last 5 years ? \_\_\_\_\_

14) If you do where do you get it? \_\_\_\_\_

15) Do you know the health status of that herd? \_\_\_\_\_

16) For spring born calves how soon after calving is the cow and calf turned out to grass? \_\_\_\_\_

**Parasites/worming:**

(1) How often are calves wormed in their first grazing season?

|                |  |
|----------------|--|
| Once           |  |
| Twice          |  |
| Three times    |  |
| More than this |  |

2) What products are used? \_\_\_\_\_

3) When are they given? \_\_\_\_\_

4) When are they given in relation to either sale/housing? \_\_\_\_\_

5) Do you rotate wormers over the course of the season? \_\_\_\_\_

6) In terms of parasite monitoring during the grazing season, are growth rates measured and used as a guide for parasite burden? \_\_\_\_\_

7) Are dung samples collected for egg counts to measure parasite burden?  
\_\_\_\_\_

8) Is there a separate worming policy for spring and autumn born calves?

|     |  |    |  |
|-----|--|----|--|
| Yes |  | No |  |
|-----|--|----|--|

9) If there is please specify?

10) Is there a worming control plan in place for second season grazers (stores)?

|     |  |    |  |
|-----|--|----|--|
| Yes |  | No |  |
|-----|--|----|--|

11) How many times are they dosed? \_\_\_\_\_

12) What are they dosed with? \_\_\_\_\_

13) When do they receive it in relation to turnout? \_\_\_\_\_



14) When do they receive it in relation to housing? \_\_\_\_\_

15) Are cows ever tested/ examined for liver fluke?

|     | By dung sample | At the abattoir |
|-----|----------------|-----------------|
| Yes |                |                 |
| No  |                |                 |

16) When was this done? \_\_\_\_\_

17) Has rumen fluke ever been diagnosed on your farm either by faecal analysis or by post mortem? \_\_\_\_\_

18) If so when was it diagnosed? \_\_\_\_\_

19) What treatment regimen was put in place? \_\_\_\_\_

20) Are cows treated for liver fluke annually? \_\_\_\_\_

21) What stage of the year are they treated? \_\_\_\_\_

22) What product is used? \_\_\_\_\_

23) Do they receive a second fluke dose if they are outwintered? \_\_\_\_\_

24) If they do when do they get it in relation to the first dose? \_\_\_\_\_

25) Are all livestock treated for lice/mange annually? \_\_\_\_\_

26) How many times are they treated? \_\_\_\_\_

27) When exactly are they treated? \_\_\_\_\_

28) What product is used? \_\_\_\_\_

**Cow health:**

- 1) Do cows receive pre-calving minerals? \_\_\_\_\_
- 2) What mineral mix is used? \_\_\_\_\_
- 3) How long is it given for? \_\_\_\_\_
- 4) How much is used? \_\_\_\_\_
- 5) How is it given?

|                           |  |
|---------------------------|--|
| Mineral lick              |  |
| Bolus                     |  |
| Granulated on silage/meal |  |
| In the water supply       |  |
| Other method              |  |

- 6) When was the herd last blood sampled for trace elements/minerals?  
\_\_\_\_\_
- 7) What was screened for?

|          |  |
|----------|--|
| Copper   |  |
| Selenium |  |
| Iodine   |  |
| Other    |  |

- 8) How many animals were used for the sampling? \_\_\_\_\_
- 9) If applicable what control plan was put in place?

10) Are all cows, breeding heifers and breeding bulls vaccinated for any of the following?

|            | Tick if used | Vaccine product | No. of doses given | Time of year given | Cows(no.) | Bulls(no.) | Heifers(no.) |
|------------|--------------|-----------------|--------------------|--------------------|-----------|------------|--------------|
| BVDV       |              |                 |                    |                    |           |            |              |
| Lepto.     |              |                 |                    |                    |           |            |              |
| IBR        |              |                 |                    |                    |           |            |              |
| Salmonella |              |                 |                    |                    |           |            |              |
| Clostridia |              |                 |                    |                    |           |            |              |
| Other      |              |                 |                    |                    |           |            |              |

11) Are cows supplemented to prevent for grass tetany? \_\_\_\_\_

12) Which of the following methods do you use?

|                 |  |
|-----------------|--|
| Bolus           |  |
| Pasture dusting |  |
| In water        |  |
| Licks           |  |
| High mag. nuts  |  |
| Other           |  |

13) For the method chosen above what is the product used?

\_\_\_\_\_

14) How many of the cows are you using this treatment on? \_\_\_\_\_

15) How much of the product is used? \_\_\_\_\_

16) When is it given? \_\_\_\_\_

17) If applicable, do cows that are dried off over the summer receive dry cow tubes?

|     |  |
|-----|--|
| Yes |  |
| No  |  |

18) Are cows dried off in batches or all dried off together?

|  |  |
|--|--|
|  |  |
|  |  |

19) Is there any fly control over the summer months? \_\_\_\_\_

20) If there is which one of the following best describes your fly control policy.

|                                               |  |
|-----------------------------------------------|--|
| Application of pour-on                        |  |
| Stockholm tar                                 |  |
| Insecticidal ear tags                         |  |
| Use of teat tape                              |  |
| Regular topping of fields                     |  |
| Resisting drying off cows between july-sept.  |  |
| Keeping animals away from ponds/water courses |  |
| Keeping animals away from wooded areas        |  |
| Other method                                  |  |

21) For any fly control products please state the product and how often it's applied.

|  |
|--|
|  |
|--|

22) Has there been a reported/recorded case of Johne's disease in the last 5 years on the farm? \_\_\_\_\_

23) If there was, was a control plan put in place? \_\_\_\_\_

24) Has there been any confirmed cases of Salmonella on your farm in the last 5 years?  
\_\_\_\_\_

25) Has there been any on farm cow deaths in the last 5 years where Clostridial disease was confirmed as the cause? \_\_\_\_\_

26) In total how many cows died on farm in 2009 and 2010?

|      |  |      |  |
|------|--|------|--|
| 2009 |  | 2010 |  |
|------|--|------|--|

27) Were post mortem examinations carried out? \_\_\_\_\_

28) What causes were identified?

|  |
|--|
|  |
|--|

**Lameness:**

1) Are cows/bull(s) routinely foot trimmed?

|     |  |    |  |
|-----|--|----|--|
| Yes |  | No |  |
|-----|--|----|--|

2) If they are what time of the year is it done? \_\_\_\_\_

3) Who performs it? \_\_\_\_\_

4) How many times was it carried out in 2009 and 2010?

|      |  |      |  |
|------|--|------|--|
| 2009 |  | 2010 |  |
|------|--|------|--|

5) Do you use a footbath on farm? \_\_\_\_\_

6) How often is it used? \_\_\_\_\_

7) When do you use a footbath (time of year)? \_\_\_\_\_

8) What type of footbath solution is used (+concentration)?  
\_\_\_\_\_

9) How often is it changed/ How many cow passes before it's changed?  
\_\_\_\_\_

10) Have you had lameness issues on your farm in 2009 and 2010?

|      |  |      |  |
|------|--|------|--|
| 2009 |  | 2010 |  |
|------|--|------|--|

11) What time of year did it occur? \_\_\_\_\_

12) If you had what was diagnosed as the cause?  
\_\_\_\_\_

13) Who diagnosed the problem? \_\_\_\_\_

14) How many animals were involved?  
\_\_\_\_\_

15) What was done about it?  
\_\_\_\_\_  
\_\_\_\_\_

**Nutrition:**

(1) Are cows condition scored?

|     |  |
|-----|--|
| Yes |  |
| No  |  |

(2) If yes, how many times were they done in 2009 and 2010?

|      |  |
|------|--|
| 2009 |  |
| 2010 |  |

(3) When was it performed in 2009 and 2010?

|      | Pre-breeding | Drying-off | Other (specify) |
|------|--------------|------------|-----------------|
| 2009 |              |            |                 |
| 2010 |              |            |                 |

(4) By whom? \_\_\_\_\_

(5) What combination of the following are cows fed over the winter period?

|                                    |  |
|------------------------------------|--|
| Pit silage                         |  |
| Round bale silage                  |  |
| Hay                                |  |
| Straw                              |  |
| Concentrates                       |  |
| Outwintered on brassicas e.g. kale |  |
| Other                              |  |

(6) Did you buy in feed supplements in 2009 or 2010?

|     |  |    |  |
|-----|--|----|--|
| Yes |  | No |  |
|-----|--|----|--|

(7) If so what did you buy in?

|                                                      | 2009 | 2010 |
|------------------------------------------------------|------|------|
| Silage                                               |      |      |
| Concentrates as nuts                                 |      |      |
| Hay                                                  |      |      |
| Straights                                            |      |      |
| By products like brewers grains etc (specify please) |      |      |
| Straw                                                |      |      |

(8) Do you use a diet feeder? \_\_\_\_\_

(9) What is the composition of the diet?

(10) Is the silage routinely analysed? \_\_\_\_\_

(11) If it's analysed do you make changes to the winter diet as a result, please specify?

---

(12) Apart from your Teagasc adviser do you use a nutritionist? \_\_\_\_\_

(13) Do cows receive minerals post calving? \_\_\_\_\_

(14) How are they given?

|                           |  |
|---------------------------|--|
| Mineral lick              |  |
| Bolus                     |  |
| Granulated on silage/meal |  |
| In the water supply       |  |
| Other method              |  |



(15) What is used? \_\_\_\_\_

(16) How long for? \_\_\_\_\_

(17) What is the grazing system at pasture?

|            |  |
|------------|--|
| Continuous |  |
| Strip      |  |
| Rotation   |  |
| Other      |  |

(18) Do you budget for grass availability? \_\_\_\_\_

(19) If so which of the following guides do you use?

|                     |  |
|---------------------|--|
| Visual              |  |
| Sward height        |  |
| Quadrant and shears |  |
| Plate meter         |  |

(20) If not what do you use as a guide? \_\_\_\_\_

(21) In times of shortage do you supplement the cows? \_\_\_\_\_

(22) What do you supplement with? \_\_\_\_\_

(23) How much do you give? \_\_\_\_\_

(24) In the breeding season and for the 2 months before it could you describe the diet of the cows.

(25) What is the diet of the the cows in the 6 weeks before calving?

|  |
|--|
|  |
|--|

(26) Where are they in this period?

---

(27) What were your turnout dates in 2009 and 2010?

|      |  |
|------|--|
| 2009 |  |
| 2010 |  |

(28) Which category of animals get turned out first?

|                          | 2009 | 2010 |
|--------------------------|------|------|
| Young (<12 months)       |      |      |
| 12-24 months old females |      |      |
| 12-24 months old males   |      |      |
| Females over 24 months   |      |      |
| Males over 24 months     |      |      |

(29) What was your housing date for 2009 and 2010?

---

**Fertility and breeding:**

1) How many females were submitted for breeding in 2009/2010?

|      |  |      |  |
|------|--|------|--|
| 2009 |  | 2010 |  |
|------|--|------|--|

2) How many of these were heifers?

|      |  |      |  |
|------|--|------|--|
| 2009 |  | 2010 |  |
|------|--|------|--|

3) How many females aborted in 2009 and 2010?

|      |  |      |  |
|------|--|------|--|
| 2009 |  | 2010 |  |
|------|--|------|--|

4) Were samples sent to the laboratory? \_\_\_\_\_

5) What was identified? \_\_\_\_\_

6) What control measures were subsequently put in place?

|  |
|--|
|  |
|--|

7) Has there been any diagnosed cases of mucosal disease in the last 5 years? \_\_\_\_\_

8) Has the herd ever been screened for BVDV before 2010? \_\_\_\_\_

9) Is the herd routinely monitored for BVDV? \_\_\_\_\_

10) If this is done how is it performed?

|                   |             |
|-------------------|-------------|
|                   | Specify age |
| Ear notch testing |             |
| Blood testing     |             |

11) What was the outcome? Were PI's (carriers) identified?

|  |
|--|
|  |
|--|

12) If carriers were identified what did you do with them?

|                            |  |
|----------------------------|--|
| Nothing                    |  |
| Euthanized immediately     |  |
| Isolated and fattened them |  |
| Sold at auction            |  |
| Slaughtered immediately    |  |
| Other                      |  |

13) Have you ever seen the AHI BVD leaflet? \_\_\_\_\_

14) Have you found it helpful? \_\_\_\_\_

15) Did you use its information for screening/monitoring? \_\_\_\_\_

16) Have you had any problems with Leptospirosis (confirmed by lab.) in the last 5 years?

\_\_\_\_\_

17) Has Neospora ever been diagnosed on the farm as a cause of abortion?

\_\_\_\_\_

18) If there has been, is there any on farm policy for testing future breeding females?

\_\_\_\_\_

19) What is your source of semen?

|            |  |      |  |      |  |
|------------|--|------|--|------|--|
| Stock bull |  | A.I. |  | Both |  |
|------------|--|------|--|------|--|

20) If you use stock bulls then how many do you have? \_\_\_\_\_

21) What is the usual source of your stock bull?

|              |  |
|--------------|--|
| Auction      |  |
| Home bred    |  |
| Private sale |  |
| Other        |  |

22) If you buy in a bull, how soon before the breeding season is this done?

\_\_\_\_\_

23) What age do you normally buy a bull at? \_\_\_\_\_

24) If you have more than one stock bull do you rotate them with the breeding herd?

\_\_\_\_\_

25) At any one time what is the bull/cow ratio in the breeding season?

\_\_\_\_\_

26) Do you make any allowances if it's a first season bull as regards bull/cow ratio?

\_\_\_\_\_

27) Do you test the semen of the bull at purchase? \_\_\_\_\_

28) What do you test the semen for?

|                                               |  |
|-----------------------------------------------|--|
| Semen concentration and quality               |  |
| Evidence of disease/Specify (e.g. IBR, BVDV ) |  |

29) How do you know your bull is working in the breeding season?

|                                                          |  |
|----------------------------------------------------------|--|
| Scanning carried out during the breeding season          |  |
| By recording services and not having cows return to heat |  |
| I don't                                                  |  |

30) What breed of bull did you use in 2009 and 2010?

\_\_\_\_\_

31) What is your source of replacement heifers?

|           |  |
|-----------|--|
| Home bred |  |
| Purchased |  |
| Both      |  |

32) Do you buy in replacement heifers as maidens or as in-calf?

|                 |      |      |
|-----------------|------|------|
|                 | 2009 | 2010 |
| Maiden          |      |      |
| In-calf heifers |      |      |

33) What age do you normally put heifers in-calf? \_\_\_\_\_

34) If already in calf at purchase what age are they at calving down?

\_\_\_\_\_

35) Do you normally use artificial insemination on heifers or put them to a bull?

\_\_\_\_\_

36) In 2009 and 2010 what did you do? How many by either method?

|      |      |            |
|------|------|------------|
|      | A.I. | Stock bull |
| 2009 |      |            |
| 2010 |      |            |

37) In 2009 and 2010 how many cows were served by bull or put to A.I.?

|      |      |            |
|------|------|------------|
|      | A.I. | Stock bull |
| 2009 |      |            |
| 2010 |      |            |

38) Do you calve your heifers at the start of the breeding season?  
\_\_\_\_\_

39) When in relation to the start of the breeding season do you serve your heifers? \_\_\_\_\_

40) What breed of bull is used on heifers? \_\_\_\_\_

41) If artificial insemination is carried out who performs it?

|            |  |        |  |      |  |
|------------|--|--------|--|------|--|
| Technician |  | Farmer |  | Both |  |
|------------|--|--------|--|------|--|

42) If the farmer performs it when did she/he first train? \_\_\_\_\_

43) When was the most recent refresher course done? \_\_\_\_\_

44) Is heat detection carried out on farm? \_\_\_\_\_

45) If yes, then how many times a day is it performed?

|               |   |   |   |   |                |
|---------------|---|---|---|---|----------------|
|               | 1 | 2 | 3 | 4 | Greater than 4 |
| Times/<br>day |   |   |   |   |                |

46) Are heat detection aids used? \_\_\_\_\_

What aids are used?

|                          | Cows | Heifers |
|--------------------------|------|---------|
| Tail paint               |      |         |
| Vasectomised bull        |      |         |
| Scratch cards            |      |         |
| If other methods specify |      |         |

47) Are cows scanned for pregnancy? \_\_\_\_\_

48) Are heifers scanned for pregnancy? \_\_\_\_\_

49) If not are they done manually? Heifers \_\_\_\_\_ Cows \_\_\_\_\_

50) Who performs the pregnancy diagnosis? \_\_\_\_\_

51) Are all breeding females done as a group or in groups? \_\_\_\_\_

52) When are they done in relation to the breeding season?

\_\_\_\_\_

53) Did you use any synchronisation programmes on the cows and heifers in 2009 and 2010? Give details

54) Do you use any intervention for getting late calvers back cycling earlier?

\_\_\_\_\_

55) Give details of this intervention.



**Biosecurity:**

1) Total number of farm staff \_\_\_\_\_

|                                             | Amount |
|---------------------------------------------|--------|
| Family members                              |        |
| Full-time staff that are not family members |        |
| Casual labour                               |        |

2) Do any staff have regular contact with other livestock?

|     |  |    |  |
|-----|--|----|--|
| Yes |  | No |  |
|-----|--|----|--|

3) What visitors have direct contact with your stock?

4) What type of farms bound your land?

|         |  |
|---------|--|
| Cattle  |  |
| Sheep   |  |
| Tillage |  |
| Other   |  |

5) Have you had animals from neighbouring farms enter your land in the last 5 years?

---

6) Have your animals escaped into neighbouring farms in the last 5 years?

---

7) Is your land all in one block, if not then how many parcels including the main block? \_\_\_\_\_

8) What type of farms bound these parcels?

|         | Parcel 2 | Parcel 3 | Parcel 4 |
|---------|----------|----------|----------|
| Cattle  |          |          |          |
| Sheep   |          |          |          |
| Tillage |          |          |          |
| Other   |          |          |          |

9) Please detail stock purchases over the last 3 years.

10) Are bought in animals isolated on arrival? \_\_\_\_\_

11) Are they isolated for at least 30 days at a distance of at least 3 metres with no mixing of urine and dung? \_\_\_\_\_

12) If bought in animals are tested for biosecure diseases ( such as IBR, BVDV etc.) please specify what they are tested for?

13) Give details of vaccine/treatment regimes for bought in stock.

|  |
|--|
|  |
|--|

14) Is there a foot dip in use for visitors? \_\_\_\_\_

15) How frequently are the contents replenished?

\_\_\_\_\_

16) Are the contents replenished in accordance with manufacturer’s instructions?

\_\_\_\_\_

17) Are regular checks made to the boundary fencing? \_\_\_\_\_

18) Is it stockproof? Quantify how often.

| A   |  | B | Every(how many) |  |       |  |
|-----|--|---|-----------------|--|-------|--|
| Yes |  |   | Day             |  | Month |  |
| No  |  |   | Week            |  | Year  |  |

19) Is there a 3 metre divide between your stock and the stock of the farmer next door?

|     |  |
|-----|--|
| Yes |  |
| No  |  |

20) If slurry is spread how soon do animals enter that field afterwards on average?

\_\_\_\_\_

21) Are livestock trailers cleaned and disinfected if used off farm?

|     |  |
|-----|--|
| Yes |  |
| No  |  |

22) Do the following visitors clean and disinfect themselves (boots, equipment and overalls) on entering your farm?

|                      | Yes | no |
|----------------------|-----|----|
| Inseminator          |     |    |
| Vet.                 |     |    |
| Agricultural advisor |     |    |
| Hoof Trimmer         |     |    |
| Scanner              |     |    |
| Others               |     |    |

23) Are animals co-grazed with other species such as sheep? Give details.

|  |
|--|
|  |
|--|

24) Do you keep dogs and cats on the farm?

|     |  |
|-----|--|
| Yes |  |
| No  |  |

25) Have you seen any of the following on your farm in 2009 and 2010?

|         | 2009 | 2010 |
|---------|------|------|
| Foxes   |      |      |
| Badgers |      |      |
| Deer    |      |      |

26) Are there any rivers or streams coursing through your farm?

|     |  |
|-----|--|
| Yes |  |
| No  |  |

27) If yes, are there farms upstream from you?

|            |  |
|------------|--|
| Yes        |  |
| No         |  |
| Don't know |  |

28) What animals have access to these water courses?

---
