# Supplementary material for: Herd health status and management practices on 16 Irish suckler beef farms
Source: PubMed Central journal article supplement (PMC3903451; doi:10.1186/2046-0481-66-21), 2013-11-06
Supplement: 2046-0481-66-21-S2.pdf [file 2046-0481-66-21-S2.pdf]

BETTER farm animal health veterinary questionnaire

Teagasc/IFJ BETTER farm animal health veterinary questionnaire

Date:

Farmer:

Veterinary clinician:

Address:

Phone number:

Mobile:

Email:

Fax:

BETTER farm animal health veterinary questionnaire

Service History:

1) How long has this practice provided a veterinary service to this farm? \_\_\_\_\_

2) Was your practice solely responsible for all clinical work provided to this farm in 2009 and 2010?

|     | 2009 | 2010 |
|-----|------|------|
| Yes |      |      |
| No  |      |      |

3) How many vets from the practice do the clinical work on the farm?

|     |  |                 |  |
|-----|--|-----------------|--|
| One |  | Three           |  |
| Two |  | More than three |  |

4) Apart from herd/private TB/Brucellosis work, how many visits on average were carried out in 2009 and 2010 to the farm?

2009 \_\_\_\_\_ 2010 \_\_\_\_\_

5) Do you know of any other veterinary practice providing a service to your client in 2009 or 2010? \_\_\_\_\_

6) Do you know whether or not your client used a service other than the one you provide to carry out reproductive work in 2009 \_\_\_\_\_ or 2010 \_\_\_\_\_?

**Herd health planning**

1) Has a formal herd health plan been designed for this farm?

Yes \_\_\_\_\_ No \_\_\_\_\_

2a) If there has been, what aspects does it cover?

|  |
|--|
|  |
|--|

2b) If not, which of the following do you routinely advise your client on?

|                                         | 2009 | 2010 |
|-----------------------------------------|------|------|
| Parasite control                        |      |      |
| Vaccination protocols                   |      |      |
| Fertility                               |      |      |
| Nutrition/minerals                      |      |      |
| Calf rearing/health                     |      |      |
| Management of replacement heifers       |      |      |
| Biosecurity                             |      |      |
| Post-calving management                 |      |      |
| Pre-calving management                  |      |      |
| Protocol for bull/Replacement purchases |      |      |
| Management/control of lameness          |      |      |
| Other advice(please specify)            |      |      |

BETTER farm animal health veterinary questionnaire

3) Did you carry out any of the following procedures on the farm in 2009 and 2010? For each year please enter the number of times for each procedure and the results if applicable.

|                                      | 2009  |         | 2010  |         |
|--------------------------------------|-------|---------|-------|---------|
|                                      | Times | Results | Times | Results |
| Disbudding calves                    |       |         |       |         |
| Dehorning (>1 month)                 |       |         |       |         |
| Castrating                           |       |         |       |         |
| Regular Pregnancy diagnosis          |       |         |       |         |
| Body condition scoring               |       |         |       |         |
| Regular hoof trimming                |       |         |       |         |
| Blood monitoring for minerals        |       |         |       |         |
| Faecal testing for gut worms         |       |         |       |         |
| Faecal testing for lungworm          |       |         |       |         |
| Faecal testing for liver/rumen fluke |       |         |       |         |
| Monitoring for BVDV                  |       |         |       |         |
| Monitoring for IBR                   |       |         |       |         |
| Monitoring for Johne's               |       |         |       |         |
| Monitoring for leptospirosis         |       |         |       |         |
| Nasal swabs for respiratory viruses  |       |         |       |         |
| Post mortem examinations             |       |         |       |         |

BETTER farm animal health veterinary questionnaire

4) What were the biggest on farm issues from your point of view in 2009 and 2010?

|                                      | 2009 | 2010 | Action/Treatment undertaken + duration |
|--------------------------------------|------|------|----------------------------------------|
| Calf scour                           |      |      |                                        |
| Joint ill                            |      |      |                                        |
| Navel ill                            |      |      |                                        |
| Septicaemia                          |      |      |                                        |
| Ill-thrift in calves                 |      |      |                                        |
| Pneumonia in calves                  |      |      |                                        |
| Meningitis                           |      |      |                                        |
| CCN                                  |      |      |                                        |
| Coccidiosis                          |      |      |                                        |
| Clostridial disease                  |      |      |                                        |
| BRD in older groups(viral/bacterial) |      |      |                                        |
| Fog fever                            |      |      |                                        |
| Pink eye/New forest eye              |      |      |                                        |
| Gut/stomach worms                    |      |      |                                        |
| Liver fluke , Rumens fluke           |      |      |                                        |
| Lungworm                             |      |      |                                        |
| Lice                                 |      |      |                                        |
| Mange                                |      |      |                                        |
| Other parasites e.g. Babesia         |      |      |                                        |
| Mineral/Vit. deficiencies            |      |      |                                        |
| Any toxicities                       |      |      |                                        |
| Infertility                          |      |      |                                        |
| Abortion                             |      |      |                                        |
| Lameness                             |      |      |                                        |
| Calving oversize                     |      |      |                                        |
| Slow/Delayed calvings                |      |      |                                        |
| Stillborn/weak calves                |      |      |                                        |
| Congenitally deformed calves         |      |      |                                        |
| Retained cleansings                  |      |      |                                        |
| Ill-thrift in older stock            |      |      |                                        |
| Acidosis/grain overload              |      |      |                                        |
| Chronic diarrhoea                    |      |      |                                        |
| Hypomagnesaemia/Tetany               |      |      |                                        |
| Dry period mastitis                  |      |      |                                        |
| Mastitis during lactation            |      |      |                                        |
| On farm sudden deaths                |      |      |                                        |
| Deaths due to injury                 |      |      |                                        |
| Other issues(specify)                |      |      |                                        |
